# Supplementary material
Source: publisher figshare collection journal article supplement (https://sage.figshare.com/ndownloader/files/12691826)
Supplement: Supplementary file 1 [file 12691826]

## Sheet: Supp Table 1, Case Series
Supplementary Table 1: Clinical, Gross, Histopathologic, and Confirmatory Test Findings of Case Series Animals
Case #	Institution	Distribution	Species (Common name)	Genus	Sex	Age (years)	Clinical History	Gross Findings				Incidental Diagnoses (Secondary infections/conditions)	Histopathology/Microscopic Diagnoses	IHC Results	PCR Results	Cause of Death
								Respiratory System	Cardiovascular System	Musculoskeletal System	Other Gross Findings
1	SNPRC	Thoracic	Baboon	Papio spp.	M	12	Coughing	Lungs diffusely pneumonic and necrotic	N/A	N/A	Poor body condition	Pancreatic amyloidosis	Pyogranulomatous necrotizing pneumonia with C. immitis	Positive	no fungal DNA identified	Coccidioides
2	SNPRC	Thoracic	Baboon	Papio spp.	M	14.1739	N/A Suspected coccidiodes	Lungs and bronchial lymph nodes increased in size and multifocally abscessed	Roughened myocardial surface	N/A	Poor body condition	Obstructive/hypertrophic gallbladder with cholelithiasis	Pyogranulomatous pneumonia and myocarditis with C. immitis	Positive	Coccidioides species	Coccidioides
3	SNPRC	Thoracic	Baboon	Papio spp.	F	2.02053	Labored breathing Natural death within 24-48 hours of onset	Massive inflammatory response and abscesses in lungs Pus in bronchi	Abscesses	N/A	Thin	None reported	Pyogranulomatous pneumonia and suppurative myocarditis with C. immitis	Positive	Coccidioides species	Coccidioides
4	SNPRC	Bone	Baboon	Papio spp.	F	12.0082	Hind leg paresis Myelogram	N/A	N/A	Soft tissue/bony damage to T10-T11, upper left dorsal and lateral spinal processes	Obese	Severe degeneration of spinal cord subjacent to inflammatory site	Pyogranulomatous osteomyelitis of vertabrae, surrounding muscle, spinal cord with C. immitis	Positive	no fungal DNA identified	Coccidioides
5	SNPRC	Thoracic	Baboon	Papio spp.	M	12.7036	None-project	Mass attached to wall of right tracheal bifurcation, extending to subjacent lymph node	N/A	N/A	N/A	Dermatitis/scarring	Granuloma in trachea, bronchial lymph nodes with C. immitis	Positive	no fungal DNA identified	Euthanized - Incidental
6	SNPRC	Hilar LN & Spleen	Baboon	Papio spp.	F	20.5038	Weak and reluctant to use hind limbs	N/A	N/A	N/A	Spleen had raised nodule, and pale tan foci in parenchyma Poor body condition	Adenoma in pancreas	Granulomas with C. immitis in hilar lymph nodes, spleen Lymphoid hyperplasia, lung and uterus	Not detected	no fungal DNA identified	Coccidioides
7	SNPRC	Bone	Baboon	Papio spp.	M	4.05202	Lameness Loss of function of hindlimbs	N/A	N/A	Paravertebral abscess Bone necrosis and osteomyelitis	N/A	N/A	Pyogranulomatous osteomyelitis of vertabrae, surrounding muscle, spinal cord with C. immitis	Not performed	Not performed	Coccidioides
8	SNPRC	Thoracic	Baboon	Papio spp.	F	2.70773	N/A	Ulceration of esophagus Lung darkly colored and adherent to chest wall	N/A	N/A	Poor body condition	Bile duct hyperplasia Fibrosis in liver	Pyogranulomatous bronchopneumonia and ulcerative esophagitis with C. immitis	Positive	no fungal DNA identified	Coccidioides
9	SNPRC	Thoracic	Baboon	Papio spp.	M	4.25188	N/A	Pneumonia			NR	NR	Lung, Specific lesions not recorded	Positive	no fungal DNA identified	Coccidioides
10	SNPRC	Thoracic	Baboon	Papio spp.	F	6.42847	Foaming mouth Coughing	Froth and pus in airways Lungs firm, with color varying from gray, red, and pink mottled	N/A	N/A	N/A	Renal and lymphoid amyloidosis Nephritis	Pyogranulomatous pneumonia with C. immitis	Positive	no fungal DNA identified	Coccidioides
11	SNPRC	Disseminated	Chimpanzee	Pan troglodytes troglodytes	F	20.2272	Antemortem diagnosis by serology and culture (thymic cyst biopsy), treated for cocc. (itraconazole)	Cloudy fluid in thoracic cavity and pleural thickening Lungs dark red with pale to tan areas	N/A	N/A	Seropurulent fluid and pockets of exudate throughout abdominal cavity Spleen firm Liver enlarged with pale tan foci Poor body condition	Protozoaisis, Edema(brain and GI), Nephritis, Steatosis, Mastitis/cellulitis	Pyogranulomatous pleuritis, pneumonia, splenitis, lymphadenitis with C. immitis; granulomatous hepatitis with C. immitis	Positive	no fungal DNA identified	Coccidioides
12	SNPRC	Disseminated	Chimpanzee	Pan troglodytes troglodytes	M	16.6352	Weight loss Enlarged spleen Tachypnea Tachycardia	Suppurative proliferative mass in left chest cavity Multiple white to tan foci on lungs	Excessive clear fluid in pericardial space	N/A	Poor body condition Excessive clear fluid in abdominal cavity White to tan foci on spleen, liver, and kidneys	Hepatitis, Nematodiasis, Nephritis, skin ulcers	Pyogranulomatous pneumonia, lymphadenitis, splenitis, with C. immitis (confirmed by culture)	Positive	Coccidioides species	Coccidioides
13	SNPRC	Disseminated	Chimpanzee	Pan troglodytes troglodytes	M	23.1595	Respiratory signs Bleeding gums, hematochezia, hyproproteinemia	Part of lung firm, tan, swollen, and purulent Tan nodules throughout lungs and adjacent lymph nodes	N/A	N/A	Liver pale orange-red, and contains tan, firm areas, along with the spleen; Lymph nodes enlarged Thin, some petechia	Hepatopathy, Typhlitis, Colitis, Appendicitis, Serositis, Fibrosis of heart, Thyroid cyst, Bone marrow hyperplasia	Pyogranulomatous pneumonia, lymphadenitis, hepatitis, splenitis, with C immitis (confirmed by culture)	Positive	Coccidioides species	Coccidioides
14	SNPRC	Disseminated	Cynomolgus	Macaca fascicularis	F	12.5695	Diarrhea	N/A	N/A	N/A	Poor body condition Miliary foci in liver, kidney, and spleen	N/A	Granulomas in lung, kidney, spleen, liver with C. immitis	Not performed	Not performed	Coccidioides
15	USAMRIID	Thoracic	Cynomolgus	Macaca fascicularis	M	6.5	Experiment related signs, monkeypox study related	Lung Nodules	N/A	N/A	Pox lesions	Poxviral lesions	Granulomatous pneumonia, lymphadenitis with C. immitis	Positive	No fungal DNA Identified	Euthanized - Incidental
16	SNPRC	Disseminated	Japanese Macaque	Macaca fuscata	M	0.503764	NR	NR	NR	NR	NR	NR	Granulomas distributed in multiple organs; Specific tissues not recorded	Not performed	Not performed	Coccidioides
17	SNPRC	Disseminated	Japanese Macaque	Macaca fuscata	M	17.2977	Paretic and paralyzed in hindlimbs Edema, Incontinence, Suspected cocc.	Lungs abscessed and infarcted, with miliary foci	Hydropericardium	N/A	Subcutaneous edema, ascites Miliary foci in liver, spleen, and kidney		Pyogranulomas with C. immitis in lung, spleen, pancreas, lymph nodes, heart wall, liver	Positive	Coccidioides species	Coccidioides
18	TVP	Thoracic	Rhesus	Macaca mulatta	M	13.5	Ruptured bladder	NR	NR	NR	NR	Amyloidosis	Granulomatous pneumonia, myocarditis	Not performed	Not performed	Coccidioides
19	TVP	Disseminated	Cynomolgus	Macaca fascicularis	M	9	Coughing and gagging; positive for Chagas	Granulomas	N/A	N/A	Poor body condition; Icterus	Amyloidosis, Myocarditis (Chagas?)	Granulomatous pneumonia, hepatitis, nephritis with C. immitis	Not performed	Not performed	Coccidioides
20	TVP	Thoracic	Rhesus	Macaca mulatta	F	14	Bloody diarrhea, kidney disease	Congested lungs, pleural effusion	N/A	Muscle edema	Ascites, Kidneys - firm, tan Edema (muscle, subcutis)	Pyelonephritis and renal amyloidosis, Myocardial infarct, Enteritis	Granuloma, lung with C. immitis	Not performed	Not performed	Euthanized - Incidental
21	TVP	Disseminated	Cynomolgus	Macaca fascicularis	M	5.83	Urinary incontinence, Rear limb paresis and neurologic deficits; Chagas positive	NR	NR	NR	NR	Chronic cystitis	Pyogranulomatous pneumonia, lymphadenitis, osteomyelitis with Coccidioides	Positive	no fungal DNA identified	Coccidioides
22	TVP	Thoracic	Rhesus	Macaca mulatta	M	11.92	Open mouth breathing, collapsed	Nodules in lungs	NR	NR	NR	Amyloidosis, cellulitis (focal), chronic gastritis	Pyogranulomatous pneumonia, lymphadenitis; Lymphoid hyperplasia	Not performed	Not performed	Coccidioides
